# Supplementary material for: Serum microRNAs in ASD: Association With Monocyte Cytokine Profiles and Mitochondrial Respiration
Source: PubMed Central journal article supplement (PMC6748029; doi:10.3389/fpsyt.2019.00614), 2019-09-10
Supplement: Table_1.pdf [file Table_1.pdf]

**Table 1** Effects of Gender and medication use on serum miRNA levels

| Clinical features        | ASD subjects           |               | Mann-Whitney p-value |
|--------------------------|------------------------|---------------|----------------------|
|                          | Male (98)              | Female (18)   |                      |
| miR-4732-5p              | 86.1±15.5              | 139.1±12.5    | 0.0295               |
| miR-423-3p               | 56272±61862            | 40093±52025   | 0.035                |
| Neuroleptics             | No (N=104)             | Yes (N=12)    | p-value              |
| miR-233-5p <sup>2</sup>  | 88.2±87.3 <sup>3</sup> | 140.3±74.5    | 0.0033               |
| miR-3614-5p <sup>2</sup> | 34.2±59.7              | 57.3±56.3     | 0.01441              |
| miR-370-3p               | 183.2±254.0            | 85.7±65.7     | 0.0292               |
| miR 99b-5p               | 9328.3±6842.5          | 5931.3±1727.0 | 0.0467               |
| ADHD <sup>1</sup> meds   | No (N=102)             | Yes (N=14)    | p-value              |
| miR-7-5p <sup>2</sup>    | 148.4±179.9            | 81.7±58.4     | 0.0424               |
| miR-103a-3p <sup>2</sup> | 644.1±327.5            | 484.3±207.4   | 0.0399               |
| AEDs                     | No (N=86)              | Yes (N=30)    | p-value              |
| miR 206 <sup>2</sup>     | 429.7±3462.7           | 54.8±50.3     | 0.0024               |
| miR 320b                 | 666.4±713.0            | 451.4±232.1   | 0.0414               |
| SSRIs                    | No (N=97)              | Yes (N=19)    | p-value              |
| miR 576-3p <sup>2</sup>  | 103.2±201.6            | 26.2±30.3     | 0.0236               |
| miR 433-3p               | 15.5±12.7              | 27.6±19.9     | 0.00439              |
| miR-20a-5p               | 310.9±570.7            | 192.9±125.2   | 0.02571              |

<sup>1</sup> Abbreviations used: ADHD, attention deficiency hyperactivity disorder; AEDs, anti-epileptic drugs; SSRIs, selective serotonin receptor inhibitors.

<sup>2</sup> miR-233-5p, miR-3614-5p, miR-7-5p, miR-103a-3p, miR 206, miR-576-3p were differentially expressed in the serum as compared to non-ASD controls.

<sup>3</sup> Serum miRNA levels were expressed as TMM normalized read counts ± SD as detailed in the methods section.

**Suppl. Table 1.** Differences of miRNA levels due to gender, and the use of medications (neuroleptics, ADHD medications, AEDs, and SSRIs)
