# Supplementary material for: Serum microRNAs in ASD: Association With Monocyte Cytokine Profiles and Mitochondrial Respiration
Source: PubMed Central journal article supplement (PMC6748029; doi:10.3389/fpsyt.2019.00614), 2019-09-10
Supplement: Table_2.pdf [file Table_2.pdf]

**Table 2** IL-1 $\beta$ /IL-10 ratios produced by PBMo under various culture conditions and mitochondrial respiration parameters by PBMCs in ASD subgroups and non-ASD controls in this study.

|                                    | IL-1 $\beta$ /IL-10 ratio based ASD subgroups |                    |                   | Non-ASD Control (N=34) | Statistics <sup>1</sup> |
|------------------------------------|-----------------------------------------------|--------------------|-------------------|------------------------|-------------------------|
|                                    | High (N=47)                                   | Normal (N=43)      | Low (N=25)        |                        |                         |
| IL-1 $\beta$ /IL-10 ratios         |                                               |                    |                   |                        |                         |
| medium                             | 1.53 $\pm$ 0.89                               | 0.86 $\pm$ 0.62    | 0.32 $\pm$ 0.19   | 0.86 $\pm$ 0.62        | <0.00001                |
| LPS                                | 3.28 $\pm$ 1.20                               | 1.15 $\pm$ 1.10    | 0.79 $\pm$ 0.59   | 2.1 $\pm$ 1.02         | <0.00001                |
| zymosan                            | 6.17 $\pm$ 4.88                               | 2.62 $\pm$ 2.52    | 1.73 $\pm$ 1.78   | 3.61 $\pm$ 2.62        | <0.00001                |
| CL097                              | 10.86 $\pm$ 5.55                              | 3.73 $\pm$ 2.50    | 3.02 $\pm$ 2.97   | 5.08 $\pm$ 4.26        | 0.00012                 |
| Mitochondrial Respiration in PBMCs |                                               |                    |                   |                        |                         |
| ALR/PLR                            | 5.87 $\pm$ 8.21                               | 8.19 $\pm$ 15.13   | 5.07 $\pm$ 5.14   | 3.53 $\pm$ 5.64        | 0.5886                  |
| MRC/PLR                            | 22.43 $\pm$ 31.82                             | 29.25 $\pm$ 49.91  | 17.07 $\pm$ 21.33 | 9.45 $\pm$ 14.09       | 0.0438                  |
| MRC                                | 93.50 $\pm$ 57.72                             | 112.24 $\pm$ 64.93 | 85.77 $\pm$ 59.26 | 68.55 $\pm$ 37.76      | 0.00411                 |
| RC                                 | 60.72 $\pm$ 50.17                             | 73.08 $\pm$ 52.33  | 51.30 $\pm$ 50.04 | 33.59 $\pm$ 30.84      | 0.00633                 |

<sup>1</sup>Krushkal Wallis test was used for assessing differences. Results were expressed as a mean value  $\pm$  SD

**Suppl. Table 2:** Results of IL-1 $\beta$ /IL-10 ratios produced by PBMo under various culture conditions and mitochondrial respiration by PBMCs in the IL-1 $\beta$ /IL-10 based ASD subgroups, and non-ASD controls. As for mitochondrial respiration parameters, MRC/PLR, MRC, and RC were found to differ among the above described study groups by Krushkal Wallis test, consistent with our previous report.
